# Supplementary material for: GC/TOF-MS-Based Metabolomics Reveals Altered Metabolic Profiles in Wood-Feeding Termite Coptotermes formosanus Shiraki Digesting the Weed Mikania micrantha Kunth
Source: MDPI journal article supplement (doi:10.3390/insects12100927), 2021-10-11
Supplement: s1 [file s1]

Table S1. Analysis of the effect of termite colony on bioassays.

(A) Colony effect on termite survival (generalized linear model).

|                  | LR     | Chisq | Df        | Pr (> Chisq) |
|------------------|--------|-------|-----------|--------------|
| Termite survival | 19.113 | 1     | 1.232e-05 | ***          |
| Colony           | 0.100  | 1     | 0.7518    |              |

(B) Colony effect on cumulative mortality (generalized linear model).

|                      | LR      | Chisq | Df     | Pr (> Chisq) |
|----------------------|---------|-------|--------|--------------|
| Cumulative mortality | 209.664 | 1     | <2e-16 | ***          |
| Feeding days         | 117.661 | 1     | <2e-16 | ***          |
| Colony               | 0.818   | 1     | 0.3648 |              |

(C) Colony effect on diet consumption (one-way ANOVA).

|                  | Sum     | Sq | Df       | F value   | Pr (> F) |
|------------------|---------|----|----------|-----------|----------|
| Diet consumption | 1213.24 | 1  | 117.7321 | 1.807e-06 | ***      |
| Colony           | 16.85   | 1  | 1.6352   | 0.233     |          |
| Residuals        | 92.75   | 9  |          |           |          |

Significant codes: '\*\*\*\*' represents 0, '\*\*\*' represents 0.001, '\*\*' represents 0.01, '.' represents 0.05, and blank ' ' represents > 0.1.
